# Supplementary material for: Assessment of Oxidative Stress-Induced Oral Epithelial Toxicity
Source: MDPI journal article supplement (doi:10.3390/biom13081239), 2023-08-11

**Supplementary Figure S1. Effect of H<sub>2</sub>O<sub>2</sub> on cell morphology.** Representative micrographs of oral keratinocytes treated with H<sub>2</sub>O<sub>2</sub>. H400, H357, and OKF6 cells were incubated with increasing concentrations of H<sub>2</sub>O<sub>2</sub> (100-1200  $\mu$ M) for 24 hours. At the end of the incubation period, morphological changes were assessed, and images were acquired using fluid cell imaging system (FLoid™ Cell Imaging Station, Life Technologies Australia) with filter sets on the bright field at 20 $\times$  magnification. Scale bar represents 100  $\mu$ m and applies to all panels.

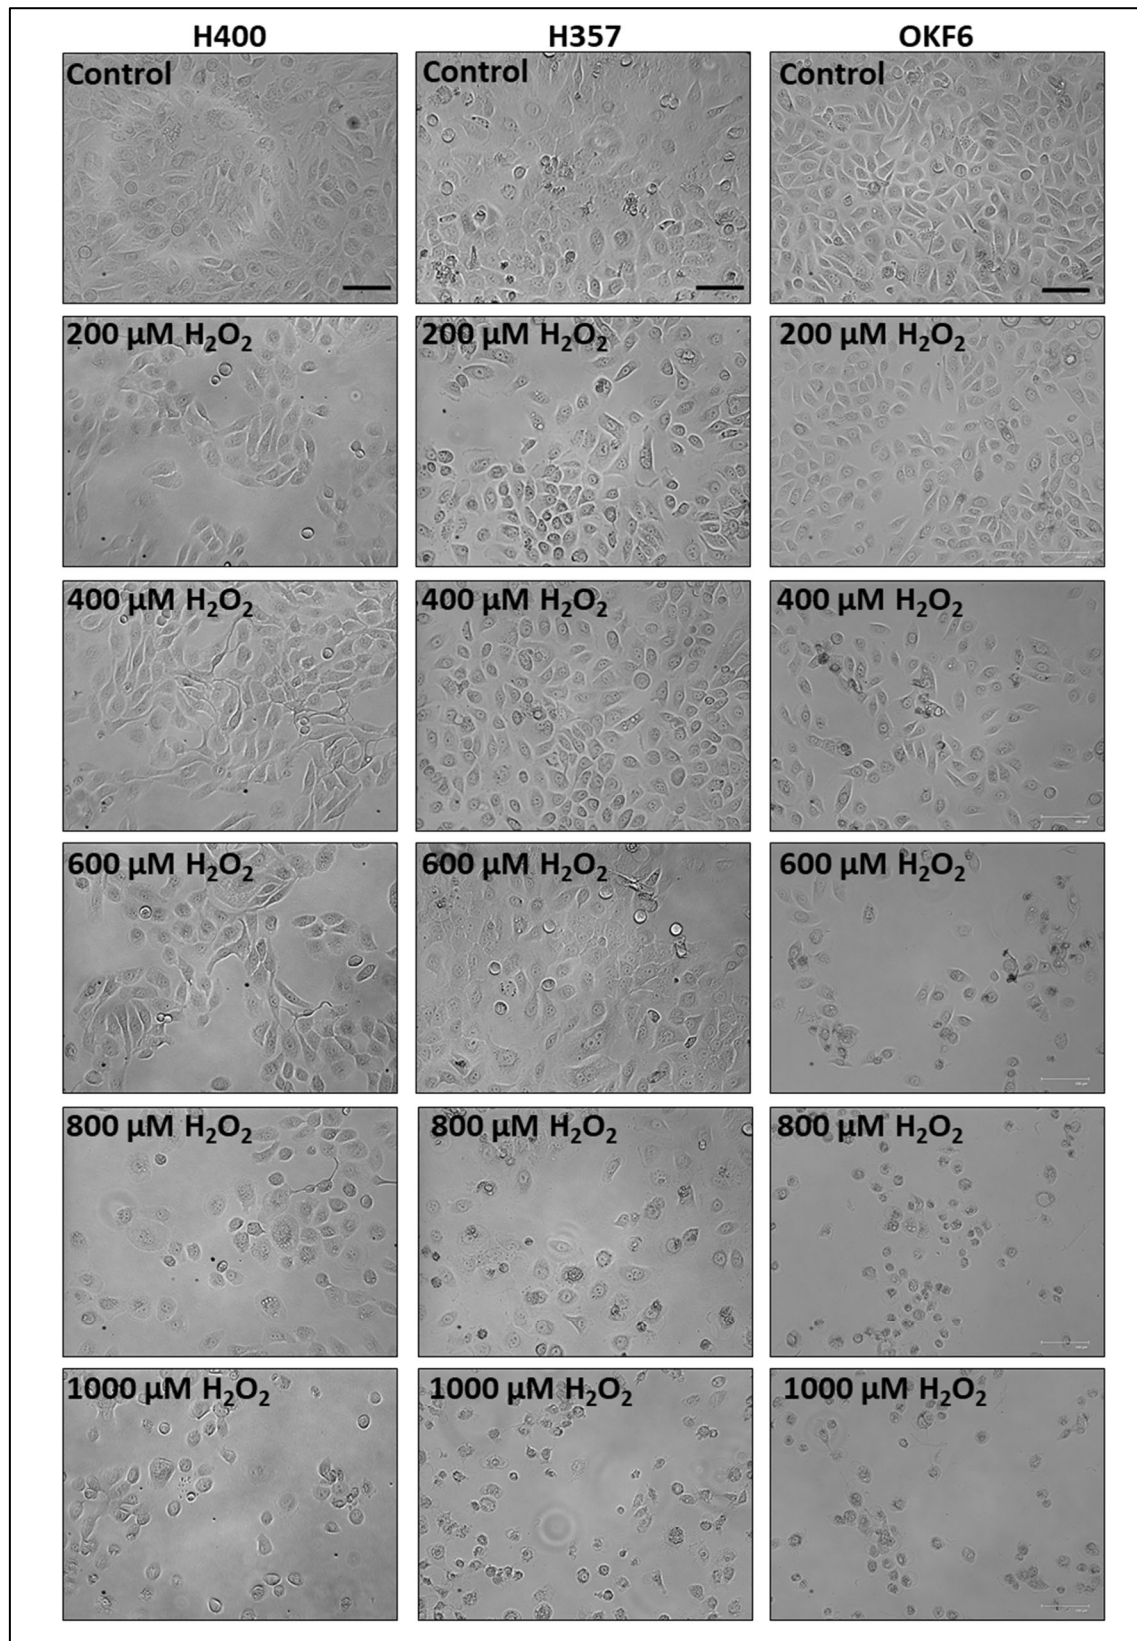

**Supplementary Figure S2. H<sub>2</sub>O<sub>2</sub> induced morphological alteration consistent with apoptotic features in oral epithelial cells.** Bright field representative micrographs (20x) of OKF6 cells. **(a):** Untreated (control) OKF6 cells retained their original morphology and were stably adherent to the culture plates. **(b):** OKF6 cells after 24 hours treatment with an IC<sub>50</sub> value of H<sub>2</sub>O<sub>2</sub> (400  $\mu$ M) displayed obvious apoptotic features, labelled with black arrows: A, apoptotic cells; C, condensed nucleus; F, fragmented nucleus; N, normal cell). Scale bar represents 100  $\mu$ m and applies to all panels.

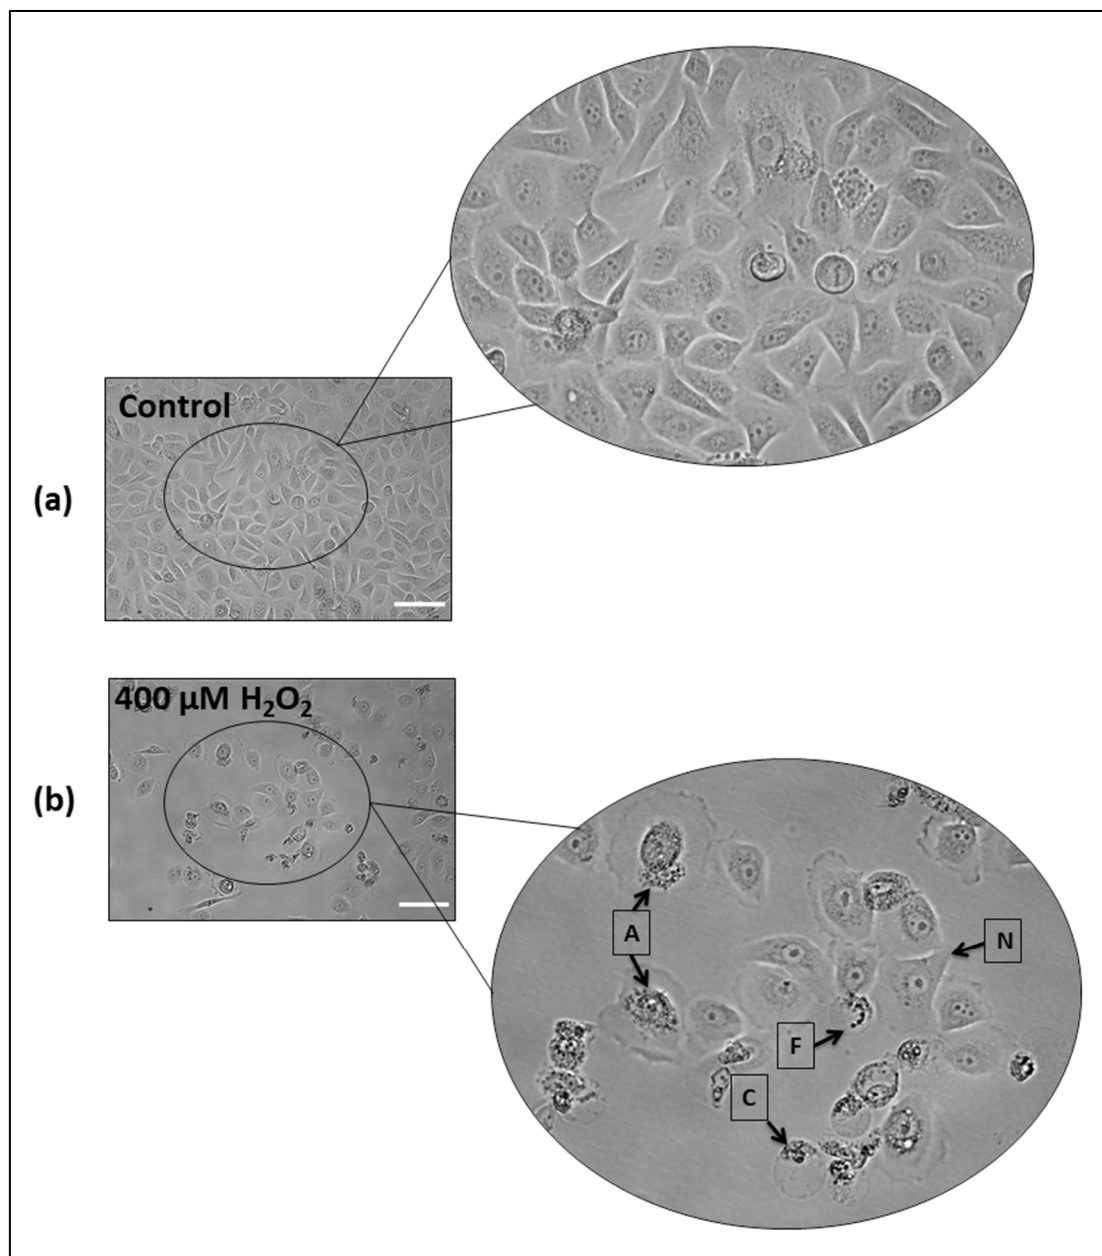

Supplement: s1 [file s1]
